# Supplementary material for: Patient Involvement in Decisions regarding Emergency Department Discharge: A Multimethod Study
Source: Emerg Med Int. 2023 Jun 6;2023:4997401. doi: 10.1155/2023/4997401 (PMC10264132; doi:10.1155/2023/4997401)
Supplement: Supplementary Materials — STROBE statement—checklist of items that should be included in reports of cross-sectional studies and COREQ (COnsolidated criteria for REporting Qualitative research) checklist. [file 4997401.f1.zip]

Archive with 2 entries (2 files):
- ISSM_COREQ__Patient involvement in decisions regarding emergency department discharge A multimethod study.pdf
- STROBE-checklist_Patient involvement in decisions regarding emergency department discharge A multimethod study.doc
